# Supplementary material for: Genome-wide analysis of ATP-binding cassette (ABC) transporters in the sweetpotato whitefly, Bemisia tabaci
Source: PubMed Central journal article supplement (PMC5405539; doi:10.1186/s12864-017-3706-6), 2017-04-26

*Bemisia tabaci*

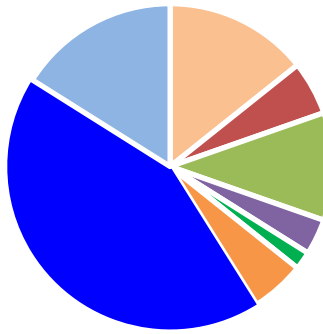

*Diuraphis noxia*

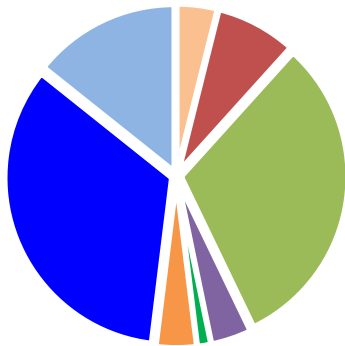

*Anopheles gambiae*

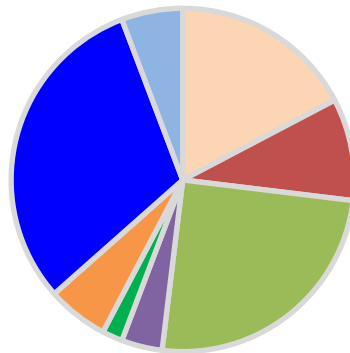

*Pediculus humanus*

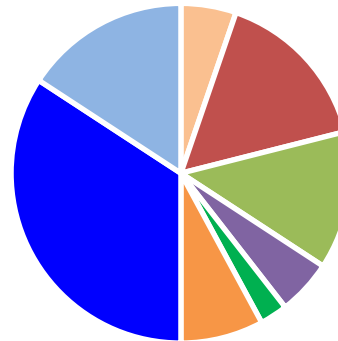

*Cimex lectularius*

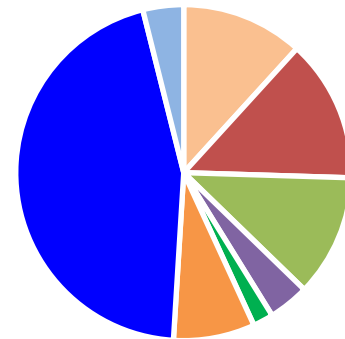

*Apis mellifera*

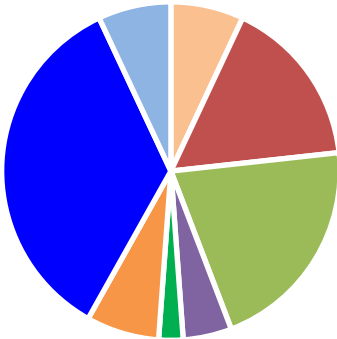

*Tetranychus urticae*

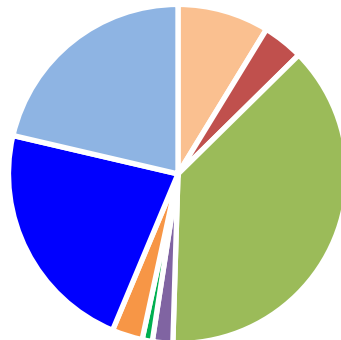

*Drosophila melanogaster*

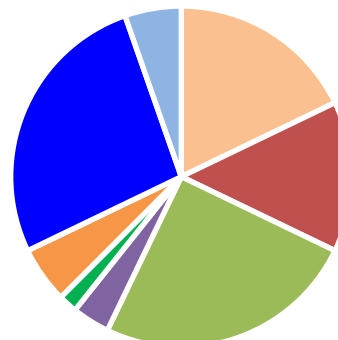

*Bombyx mori*

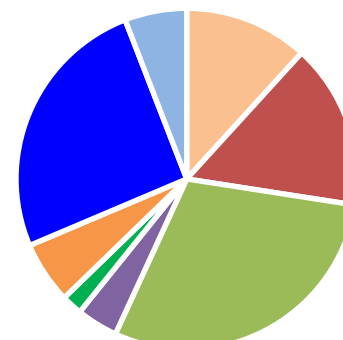

*Helicoverpa armigera*

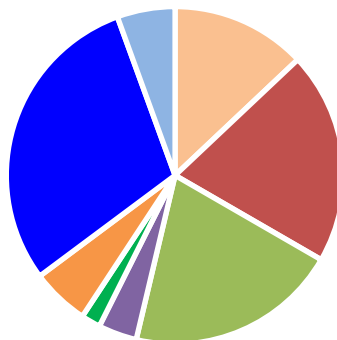

*Tribolium castaneum*

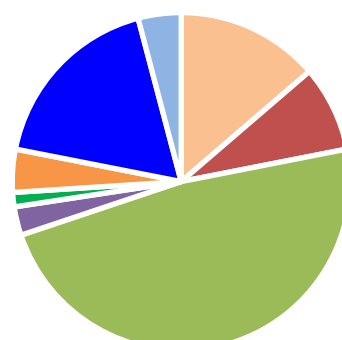

*Homo sapiens*

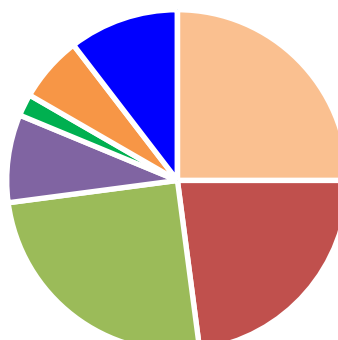

*Caenorhabditis elegans*

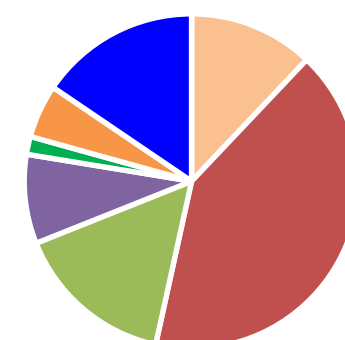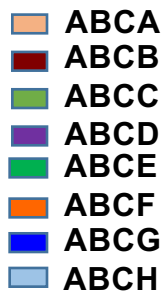

Supplement: 12864_2017_3706_MOESM1_ESM.pdf [file 12864_2017_3706_MOESM1_ESM.pdf]
