# Supplementary material for: Genome-wide analysis of ATP-binding cassette (ABC) transporters in the sweetpotato whitefly, Bemisia tabaci
Source: PubMed Central journal article supplement (PMC5405539; doi:10.1186/s12864-017-3706-6), 2017-04-26
Supplement: 12864_2017_3706_MOESM5_ESM.pdf [file 12864_2017_3706_MOESM5_ESM.pdf]

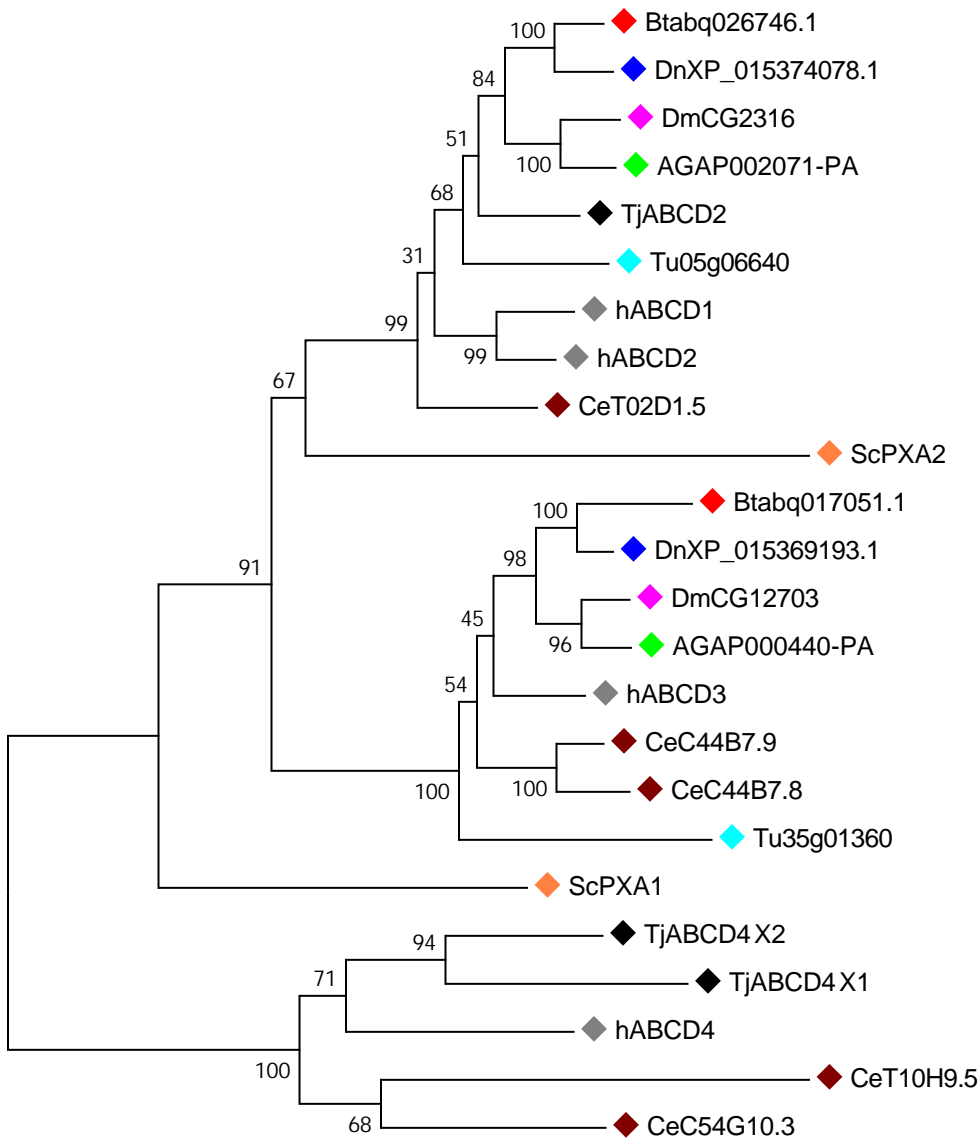

0.5
